# Supplementary material for: Wet chemical synthesis of Cu/TiO2 nanocomposites with integrated nano-current-collectors as high-rate anode materials in lithium-ion batteries
Source: Royal Society of Chemistry journal article supplement (doi:10.1039/c0cp01119c), 2011-01-01
Supplement: c0cp01119c.pdf [file c0cp01119c.pdf]

Electronic Supplementary Information for

# Wet chemical synthesis of Cu@TiO<sub>2</sub> nanocomposites with integrated nano-current-collectors as high-rate anode materials in lithium-ion batteries

Fei-Fei Cao,<sup>ab</sup> Sen Xin,<sup>ab</sup> Yu-Guo Guo<sup>\*a</sup> and Li-Jun Wan<sup>\*a</sup>

<sup>a</sup> CAS Key Laboratory of Molecular Nanostructure and Nanotechnology, and Beijing National Laboratory for Molecular Sciences, Institute of Chemistry, Chinese Academy of Sciences (CAS), Beijing 100190, P. R. China.

<sup>b</sup> Also at the Graduate School of CAS, Beijing 100064, P. R. China

\* Corresponding author. E-mail: [ygguo@iccas.ac.cn](mailto:ygguo@iccas.ac.cn), Tel. & Fax: (86)10-62557908

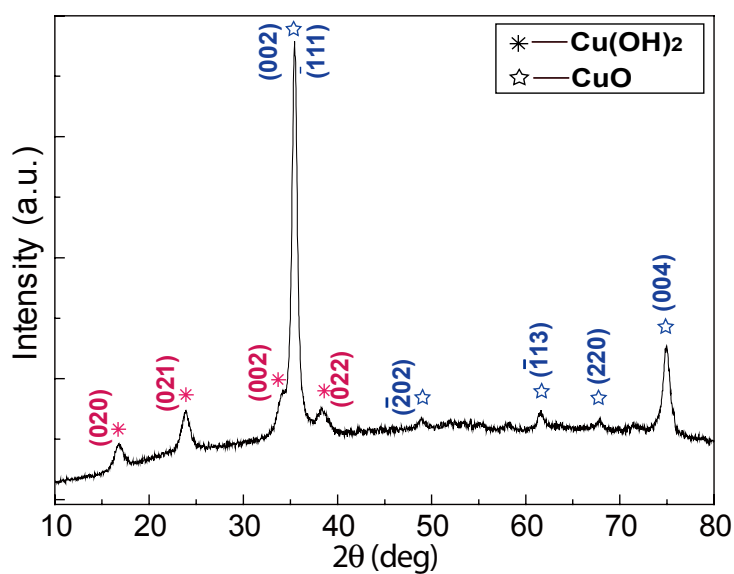

Fig. S1 XRD pattern of the as-prepared Cu-based nanowires

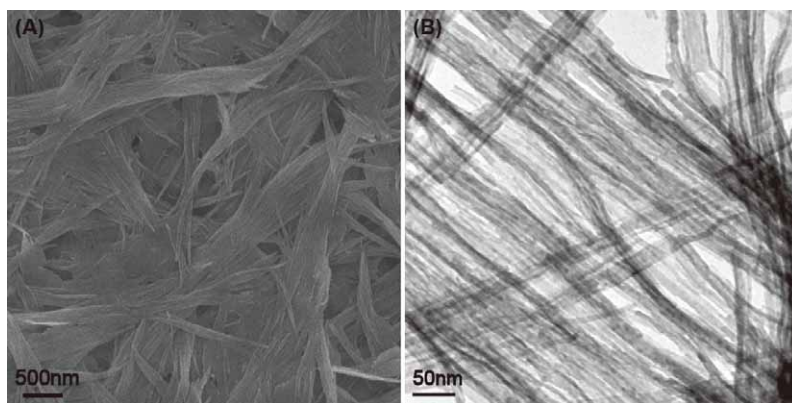

**Fig. S2** Morphology characterization of the as-prepared Cu-based nanowires (A) SEM images; (B) TEM images

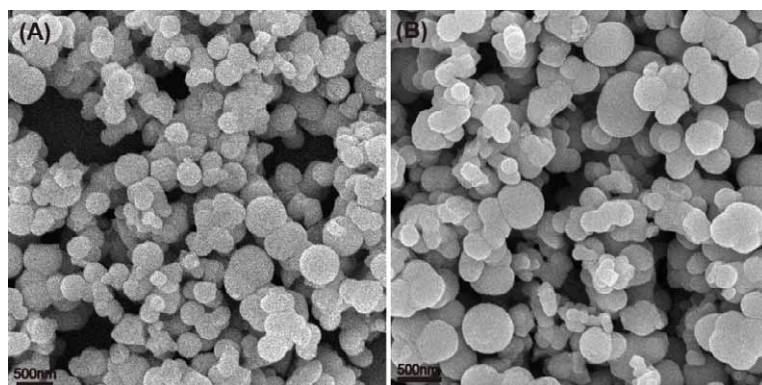

**Fig. S3** SEM images of the bare TiO<sub>2</sub> (A) T1; (B) T2.

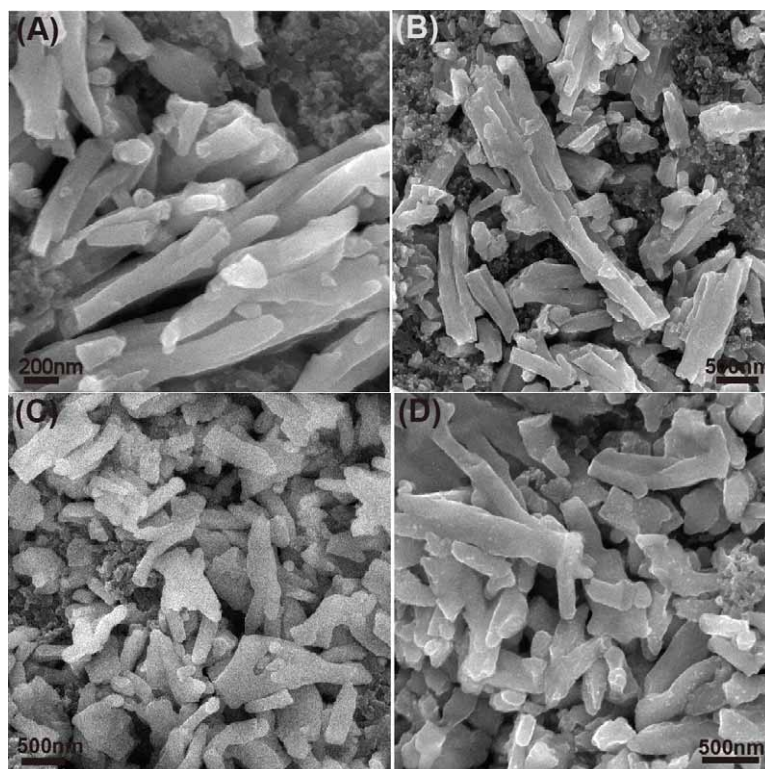

**Fig. S4** SEM images of Cu@TiO<sub>2</sub> nanocomposites on electrode foils before and after use in batteries. (A) S1 before use; (B) S1 after use; (C) S2 before use; (D) S2 after use.
